# Supplementary material
Source: publisher figshare collection journal article supplement (https://acs.figshare.com/ndownloader/files/5708271)
Supplement: Supplementary file 1 [file 5708271]

data_1

_exptl_absorpt_correction_nazim   2.5
_diffrn_measurement_domega        0.3
_diffrn_measurement_rtime         30

_chemical_formula_sum             'C16 H20 Ag F3 N2 O3 S'
_chemical_formula_weight          501.26

loop_
 _atom_type_symbol
 _atom_type_description
 _atom_type_scat_dispersion_real
 _atom_type_scat_dispersion_imag
 _atom_type_scat_source
 'C'  'C'   0.0033   0.0016
 'International Tables Vol C Tables 4.2.6.8 and 6.1.1.4'
 'H'  'H'   0.0000   0.0000
 'International Tables Vol C Tables 4.2.6.8 and 6.1.1.4'
 'N'  'N'   0.0061   0.0033
 'International Tables Vol C Tables 4.2.6.8 and 6.1.1.4'
 'O'  'O'   0.0106   0.0060
 'International Tables Vol C Tables 4.2.6.8 and 6.1.1.4'
 'S'  'S'   0.1246   0.1234
 'International Tables Vol C Tables 4.2.6.8 and 6.1.1.4'
 'Ag'  'Ag'  -0.8971   1.1015
 'International Tables Vol C Tables 4.2.6.8 and 6.1.1.4'
 'F'  'F'   0.0171   0.0103
 'International Tables Vol C Tables 4.2.6.8 and 6.1.1.4'

_symmetry_cell_setting            Monoclinic
_symmetry_space_group_name_H-M    'P 21/n  (14)'

loop_
 _symmetry_equiv_pos_as_xyz
 'x, y, z'
 '-x+1/2, y+1/2, -z+1/2'
 '-x, -y, -z'
 'x-1/2, -y-1/2, z-1/2'

_cell_length_a                    10.263(3)
_cell_length_b                    9.303(2)
_cell_length_c                    21.346(4)
_cell_angle_alpha                 90.00
_cell_angle_beta                  95.81(2)
_cell_angle_gamma                 90.00
_cell_volume                      2027.6(8)
_cell_formula_units_Z             4
_cell_measurement_temperature     293(2)
_cell_measurement_reflns_used     102
_cell_measurement_theta_min       2
_cell_measurement_theta_max       27

_exptl_crystal_description        column
_exptl_crystal_colour             colourless
_exptl_crystal_size_max           0.26
_exptl_crystal_size_mid           0.12
_exptl_crystal_size_min           0.12
_exptl_crystal_density_diffrn     1.642
_exptl_crystal_F_000              1008
_exptl_absorpt_coefficient_mu     1.147
_exptl_absorpt_correction_type    sadabs
_exptl_absorpt_correction_T_min   1.00
_exptl_absorpt_correction_T_max   0.42

_diffrn_ambient_temperature       293(2)
_diffrn_radiation_wavelength      0.71073
_diffrn_radiation_type            MoK\a
_diffrn_radiation_source          'fine-focus sealed tube'
_diffrn_radiation_monochromator   graphite
_diffrn_measurement_device        SMART
_diffrn_detector_type             CCD_plate
_diffrn_measurement_method        omega-scan
_diffrn_standards_decay_%         8
_diffrn_reflns_number             10028
_diffrn_reflns_av_R_equivalents   0.0616
_diffrn_reflns_av_sigmaI/netI     0.1014
_diffrn_reflns_limit_h_min        -12
_diffrn_reflns_limit_h_max        12
_diffrn_reflns_limit_k_min        -9
_diffrn_reflns_limit_k_max        11
_diffrn_reflns_limit_l_min        -27
_diffrn_reflns_limit_l_max        20
_diffrn_reflns_theta_min          2
_diffrn_reflns_theta_max          27
_reflns_number_total              3891
_reflns_number_observed           1405
_reflns_observed_criterion        >2sigma(I)

_computing_structure_solution     SIR92
_computing_structure_refinement   'SHELXL-93 (Sheldrick, 1993)'
_computing_molecular_graphics     SCHAKAL

_refine_special_details
;
 Refinement on F^2^ for ALL reflections except for 0 with very negative F^2^
 or flagged by the user for potential systematic errors.  Weighted R-factors
 wR and all goodnesses of fit S are based on F^2^, conventional R-factors R
 are based on F, with F set to zero for negative F^2^. The observed criterion
 of F^2^ > 2sigma(F^2^) is used only for calculating _R_factor_obs etc. and is
 not relevant to the choice of reflections for refinement.  R-factors based
 on F^2^ are statistically about twice as large as those based on F, and R-
 factors based on ALL data will be even larger.
;

_refine_ls_structure_factor_coef  Fsqd
_refine_ls_matrix_type            full
_refine_ls_weighting_scheme
 'calc w=1/[\s^2^(Fo^2^)+(0.0699P)^2^+0.0000P] where P=(Fo^2^+2Fc^2^)/3'
_atom_sites_solution_primary      direct
_atom_sites_solution_secondary    difmap
_atom_sites_solution_hydrogens    geom
_refine_ls_hydrogen_treatment     riding
_refine_ls_extinction_method      none
_refine_ls_number_reflns          3891
_refine_ls_number_parameters      229
_refine_ls_number_restraints      0
_refine_ls_R_factor_all           0.1196
_refine_ls_R_factor_obs           0.0578
_refine_ls_wR_factor_all          0.1484
_refine_ls_wR_factor_obs          0.1385
_refine_ls_goodness_of_fit_all    0.754
_refine_ls_goodness_of_fit_obs    1.234
_refine_ls_restrained_S_all       0.754
_refine_ls_restrained_S_obs       1.234
_refine_ls_shift/esd_max          -0.047
_refine_ls_shift/esd_mean         0.008

loop_
 _atom_site_label
 _atom_site_type_symbol
 _atom_site_fract_x
 _atom_site_fract_y
 _atom_site_fract_z
 _atom_site_U_iso_or_equiv
 _atom_site_thermal_displace_type
 _atom_site_occupancy
 _atom_site_calc_flag
 _atom_site_refinement_flags
 _atom_site_disorder_group
Ag Ag 0.48289(5) 0.24986(5) 0.49622(2) 0.0893(3) Uani 1 d . .
N1 N 0.5549(6) 0.4081(5) 0.4370(2) 0.0635(14) Uani 1 d . .
C2 C 0.6792(7) 0.4547(7) 0.4425(3) 0.069(2) Uani 1 d . .
H2 H 0.7364(7) 0.4201(7) 0.4756(3) 0.082 Uiso 1 calc R .
C3 C 0.7257(6) 0.5503(7) 0.4019(3) 0.064(2) Uani 1 d . .
H3 H 0.8126(6) 0.5799(7) 0.4083(3) 0.077 Uiso 1 calc R .
C4 C 0.6467(6) 0.6037(6) 0.3518(3) 0.055(2) Uani 1 d . .
C5 C 0.5194(6) 0.5583(8) 0.3472(3) 0.072(2) Uani 1 d . .
H5 H 0.4598(6) 0.5934(8) 0.3151(3) 0.086 Uiso 1 calc R .
C6 C 0.4793(7) 0.4612(8) 0.3896(4) 0.081(2) Uani 1 d . .
H6 H 0.3925(7) 0.4310(8) 0.3842(4) 0.097 Uiso 1 calc R .
C7 C 0.6988(6) 0.6984(6) 0.3032(3) 0.063(2) Uani 1 d . .
H7A H 0.7721(6) 0.7539(6) 0.3226(3) 0.075 Uiso 1 calc R .
H7B H 0.6311(6) 0.7652(6) 0.2868(3) 0.075 Uiso 1 calc R .
C8 C 0.7430(5) 0.6102(6) 0.2494(2) 0.058(2) Uani 1 d . .
H8A H 0.6719(5) 0.5472(6) 0.2336(2) 0.070 Uiso 1 calc R .
H8B H 0.8158(5) 0.5500(6) 0.2658(2) 0.070 Uiso 1 calc R .
C9 C 0.7853(6) 0.6978(6) 0.1943(3) 0.060(2) Uani 1 d . .
H9A H 0.7121(6) 0.7549(6) 0.1760(3) 0.073 Uiso 1 calc R .
H9B H 0.8553(6) 0.7629(6) 0.2095(3) 0.073 Uiso 1 calc R .
C10 C 0.8317(6) 0.6007(6) 0.1451(3) 0.0511(15) Uani 1 d . .
C11 C 0.9602(6) 0.5674(7) 0.1435(3) 0.067(2) Uani 1 d . .
H11 H 1.0230(6) 0.6097(7) 0.1721(3) 0.080 Uiso 1 calc R .
C12 C 0.9980(6) 0.4707(8) 0.0995(4) 0.077(2) Uani 1 d . .
H12 H 1.0866(6) 0.4495(8) 0.0997(4) 0.092 Uiso 1 calc R .
N13 N 0.9141(6) 0.4069(5) 0.0572(2) 0.0617(14) Uani 1 d . .
C14 C 0.7878(7) 0.4434(7) 0.0587(3) 0.070(2) Uani 1 d . .
H14 H 0.7260(7) 0.4013(7) 0.0294(3) 0.085 Uiso 1 calc R .
C15 C 0.7450(6) 0.5383(7) 0.1006(3) 0.064(2) Uani 1 d . .
H15 H 0.6564(6) 0.5607(7) 0.0988(3) 0.077 Uiso 1 calc R .
C1S C 0.0889(11) 0.3190(14) 0.3478(6) 0.199(5) Uiso 1 d . .
H1S1 H 0.1131(11) 0.4082(14) 0.3295(6) 0.298 Uiso 1 calc R .
H1S2 H -0.0023(11) 0.3006(14) 0.3360(6) 0.298 Uiso 1 calc R .
H1S3 H 0.1402(11) 0.2424(14) 0.3329(6) 0.298 Uiso 1 calc R .
C2S C 0.1127(10) 0.3282(13) 0.4162(5) 0.172(4) Uiso 1 d . .
H2S1 H 0.0434(10) 0.2855(13) 0.4377(5) 0.207 Uiso 1 calc R .
H2S2 H 0.1309(10) 0.4252(13) 0.4312(5) 0.207 Uiso 1 calc R .
O3S O 0.2346(6) 0.2346(6) 0.4181(3) 0.142(2) Uiso 1 d . .
H3S H 0.2452(6) 0.2080(6) 0.3824(3) 0.213 Uiso 1 calc R .
C C 0.8515(12) 0.2043(13) 0.6805(6) 0.147(5) Uani 1 d . .
F1 F 0.8480(11) 0.3361(9) 0.6991(4) 0.260(5) Uani 1 d . .
F2 F 0.7506(8) 0.1346(9) 0.6958(3) 0.220(4) Uani 1 d . .
F3 F 0.9548(8) 0.1477(9) 0.7120(3) 0.247(4) Uani 1 d . .
S S 0.8683(2) 0.1921(3) 0.59786(12) 0.0992(7) Uani 1 d . .
O1 O 0.8735(7) 0.0426(7) 0.5894(3) 0.179(3) Uani 1 d . .
O2 O 0.7487(5) 0.2549(6) 0.5715(3) 0.129(2) Uani 1 d . .
O3 O 0.9821(6) 0.2703(7) 0.5901(4) 0.175(3) Uani 1 d . .

loop_
 _atom_site_aniso_label
 _atom_site_aniso_U_11
 _atom_site_aniso_U_22
 _atom_site_aniso_U_33
 _atom_site_aniso_U_23
 _atom_site_aniso_U_13
 _atom_site_aniso_U_12
Ag 0.1293(6) 0.0703(4) 0.0778(4) 0.0003(3) 0.0575(3) -0.0182(3)
N1 0.075(4) 0.062(4) 0.057(4) -0.004(3) 0.022(3) -0.009(3)
C2 0.078(5) 0.068(4) 0.061(5) 0.000(4) 0.010(4) -0.003(4)
C3 0.057(4) 0.066(4) 0.071(5) 0.003(4) 0.013(4) -0.012(3)
C4 0.068(5) 0.047(4) 0.053(4) -0.009(3) 0.025(4) 0.002(3)
C5 0.057(5) 0.089(5) 0.073(5) 0.007(4) 0.015(4) -0.004(4)
C6 0.065(5) 0.100(6) 0.081(6) 0.002(5) 0.020(5) -0.018(4)
C7 0.085(4) 0.057(4) 0.050(4) 0.001(3) 0.021(3) -0.002(3)
C8 0.075(4) 0.054(4) 0.050(3) 0.000(3) 0.026(3) 0.002(3)
C9 0.080(4) 0.052(4) 0.052(4) 0.001(3) 0.022(3) 0.001(3)
C10 0.067(5) 0.045(4) 0.043(4) 0.007(3) 0.014(3) -0.002(3)
C11 0.055(4) 0.077(5) 0.069(5) -0.007(4) 0.010(4) 0.005(4)
C12 0.046(4) 0.096(6) 0.093(6) 0.010(5) 0.023(4) 0.015(4)
N13 0.066(4) 0.065(4) 0.055(4) 0.006(3) 0.015(3) 0.007(3)
C14 0.068(5) 0.084(5) 0.058(5) -0.007(4) 0.002(4) 0.009(4)
C15 0.059(4) 0.079(5) 0.057(4) -0.004(4) 0.011(4) 0.012(4)
C 0.126(9) 0.166(11) 0.132(11) 0.035(8) -0.066(8) -0.038(8)
F1 0.416(13) 0.180(7) 0.180(7) -0.046(7) 0.014(7) -0.010(9)
F2 0.221(7) 0.348(11) 0.091(4) 0.023(5) 0.008(5) -0.106(7)
F3 0.212(7) 0.314(10) 0.189(7) 0.053(7) -0.111(6) -0.012(7)
S 0.0716(15) 0.109(2) 0.116(2) 0.0069(14) 0.0044(13) -0.0153(12)
O1 0.221(7) 0.104(5) 0.211(8) -0.025(5) 0.015(6) -0.009(5)
O2 0.075(3) 0.188(6) 0.119(5) 0.067(4) -0.015(3) 0.004(4)
O3 0.099(4) 0.192(7) 0.238(8) 0.003(5) 0.044(5) -0.070(4)

_geom_special_details
;
 All esds (except the esd in the dihedral angle between two l.s. planes)
 are estimated using the full covariance matrix.  The cell esds are taken
 into account individually in the estimation of esds in distances, angles
 and torsion angles; correlations between esds in cell parameters are only
 used when they are defined by crystal symmetry.  An approximate (isotropic)
 treatment of cell esds is used for estimating esds involving l.s. planes.
;

loop_
 _geom_bond_atom_site_label_1
 _geom_bond_atom_site_label_2
 _geom_bond_distance
 _geom_bond_site_symmetry_2
 _geom_bond_publ_flag
Ag N13 2.122(5) 4_566 ?
Ag N1 2.121(5) . ?
N1 C6 1.309(7) . ?
N1 C2 1.342(7) . ?
C2 C3 1.361(8) . ?
C3 C4 1.368(7) . ?
C4 C5 1.366(7) . ?
C4 C7 1.501(7) . ?
C5 C6 1.371(9) . ?
C7 C8 1.518(7) . ?
C8 C9 1.528(7) . ?
C9 C10 1.500(7) . ?
C10 C11 1.358(7) . ?
C10 C15 1.364(7) . ?
C11 C12 1.384(9) . ?
C12 N13 1.324(8) . ?
N13 C14 1.344(7) . ?
N13 Ag 2.122(5) 4_665 ?
C14 C15 1.360(8) . ?
C1S C2S 1.458(12) . ?
C2S O3S 1.522(11) . ?
C F2 1.292(11) . ?
C F3 1.308(10) . ?
C F1 1.290(12) . ?
C S 1.792(13) . ?
S O3 1.400(5) . ?
S O1 1.404(6) . ?
S O2 1.423(5) . ?

loop_
 _geom_angle_atom_site_label_1
 _geom_angle_atom_site_label_2
 _geom_angle_atom_site_label_3
 _geom_angle
 _geom_angle_site_symmetry_1
 _geom_angle_site_symmetry_3
 _geom_angle_publ_flag
N13 Ag N1 178.7(2) 4_566 . ?
C6 N1 C2 115.4(6) . . ?
C6 N1 Ag 120.5(5) . . ?
C2 N1 Ag 123.9(5) . . ?
N1 C2 C3 123.2(6) . . ?
C2 C3 C4 121.1(6) . . ?
C3 C4 C5 115.5(6) . . ?
C3 C4 C7 121.9(6) . . ?
C5 C4 C7 122.4(6) . . ?
C4 C5 C6 120.3(6) . . ?
N1 C6 C5 124.4(6) . . ?
C4 C7 C8 111.1(5) . . ?
C7 C8 C9 115.0(5) . . ?
C10 C9 C8 110.6(5) . . ?
C11 C10 C15 116.9(6) . . ?
C11 C10 C9 122.2(6) . . ?
C15 C10 C9 120.9(6) . . ?
C10 C11 C12 120.3(6) . . ?
N13 C12 C11 123.2(6) . . ?
C12 N13 C14 115.6(6) . . ?
C12 N13 Ag 119.5(5) . 4_665 ?
C14 N13 Ag 124.8(5) . 4_665 ?
N13 C14 C15 123.8(6) . . ?
C14 C15 C10 120.2(6) . . ?
C1S C2S O3S 92.8(9) . . ?
F2 C F3 107.2(11) . . ?
F2 C F1 110.5(13) . . ?
F3 C F1 105.6(9) . . ?
F2 C S 112.2(7) . . ?
F3 C S 109.1(10) . . ?
F1 C S 111.8(9) . . ?
O3 S O1 117.1(5) . . ?
O3 S O2 115.9(4) . . ?
O1 S O2 113.5(4) . . ?
O3 S C 104.4(5) . . ?
O1 S C 101.5(5) . . ?
O2 S C 101.4(5) . . ?

_refine_diff_density_max    0.772
_refine_diff_density_min   -0.828
_refine_diff_density_rms    0.107


data_2

_exptl_absorpt_correction_nazim   4873
_diffrn_measurement_domega        0.3
_diffrn_measurement_rtime         10

_chemical_formula_sum             'C14 H14 Ag F3 N2 O3 S'
_chemical_formula_weight          455.20

loop_
 _atom_type_symbol
 _atom_type_description
 _atom_type_scat_dispersion_real
 _atom_type_scat_dispersion_imag
 _atom_type_scat_source
 'C'  'C'   0.0033   0.0016
 'International Tables Vol C Tables 4.2.6.8 and 6.1.1.4'
 'H'  'H'   0.0000   0.0000
 'International Tables Vol C Tables 4.2.6.8 and 6.1.1.4'
 'N'  'N'   0.0061   0.0033
 'International Tables Vol C Tables 4.2.6.8 and 6.1.1.4'
 'O'  'O'   0.0106   0.0060
 'International Tables Vol C Tables 4.2.6.8 and 6.1.1.4'
 'F'  'F'   0.0171   0.0103
 'International Tables Vol C Tables 4.2.6.8 and 6.1.1.4'
 'S'  'S'   0.1246   0.1234
 'International Tables Vol C Tables 4.2.6.8 and 6.1.1.4'
 'Ag'  'Ag'  -0.8971   1.1015
 'International Tables Vol C Tables 4.2.6.8 and 6.1.1.4'

_symmetry_cell_setting            Orthorhombic
_symmetry_space_group_name_H-M    'Pbna  (60)'

loop_
 _symmetry_equiv_pos_as_xyz
 'x, y, z'
 '-x+1/2, -y, z+1/2'
 'x, -y+1/2, -z'
 '-x+1/2, y+1/2, -z+1/2'
 '-x, -y, -z'
 'x-1/2, y, -z-1/2'
 '-x, y-1/2, z'
 'x-1/2, -y-1/2, z-1/2'

_cell_length_a                    10.573(2)
_cell_length_b                    13.533(2)
_cell_length_c                    23.196(6)
_cell_angle_alpha                 90.00
_cell_angle_beta                  90.00
_cell_angle_gamma                 90.00
_cell_volume                      3319.0(12)
_cell_formula_units_Z             8
_cell_measurement_temperature     293(2)
_cell_measurement_reflns_used     103
_cell_measurement_theta_min       1.
_cell_measurement_theta_max       26.

_exptl_crystal_description        column
_exptl_crystal_colour             colourless
_exptl_crystal_size_max           0.25
_exptl_crystal_size_mid           0.13
_exptl_crystal_size_min           0.10
_exptl_crystal_density_diffrn     1.822
_exptl_crystal_F_000              1808
_exptl_absorpt_coefficient_mu     1.387
_exptl_absorpt_correction_type    sadabs
_exptl_absorpt_correction_T_min   0.53
_exptl_absorpt_correction_T_max   1.00

_diffrn_ambient_temperature       293(2)
_diffrn_radiation_wavelength      0.71073
_diffrn_radiation_type            MoK\a
_diffrn_radiation_source          'fine-focus sealed tube'
_diffrn_radiation_monochromator   graphite
_diffrn_measurement_device        SMART
_diffrn_detector_type             CCD_plate
_diffrn_measurement_method        omega-scan
_diffrn_standards_decay_%         0.
_diffrn_reflns_number             13275
_diffrn_reflns_av_R_equivalents   0.0845
_diffrn_reflns_av_sigmaI/netI     0.0764
_diffrn_reflns_limit_h_min        -12
_diffrn_reflns_limit_h_max        6
_diffrn_reflns_limit_k_min        -16
_diffrn_reflns_limit_k_max        15
_diffrn_reflns_limit_l_min        -27
_diffrn_reflns_limit_l_max        27
_diffrn_reflns_theta_min          1.
_diffrn_reflns_theta_max          26.
_reflns_number_total              2973
_reflns_number_observed           1483
_reflns_observed_criterion        >2sigma(I)

_computing_structure_solution     SIR92
_computing_structure_refinement   'SHELXL-93 (Sheldrick, 1993)'
_computing_molecular_graphics     SCHAKAL

_refine_special_details
;
 Refinement on F^2^ for ALL reflections except for 0 with very negative F^2^
 or flagged by the user for potential systematic errors.  Weighted R-factors
 wR and all goodnesses of fit S are based on F^2^, conventional R-factors R
 are based on F, with F set to zero for negative F^2^. The observed criterion
 of F^2^ > 2sigma(F^2^) is used only for calculating _R_factor_obs etc. and is
 not relevant to the choice of reflections for refinement.  R-factors based
 on F^2^ are statistically about twice as large as those based on F, and R-
 factors based on ALL data will be even larger.
;

_refine_ls_structure_factor_coef  Fsqd
_refine_ls_matrix_type            full
_refine_ls_weighting_scheme
 'calc w=1/[\s^2^(Fo^2^)+(0.0487P)^2^+5.7485P] where P=(Fo^2^+2Fc^2^)/3'
_atom_sites_solution_primary      direct
_atom_sites_solution_secondary    difmap
_atom_sites_solution_hydrogens    geom
_refine_ls_hydrogen_treatment     riding
_refine_ls_extinction_method      none
_refine_ls_number_reflns          2973
_refine_ls_number_parameters      235
_refine_ls_number_restraints      0
_refine_ls_R_factor_all           0.1462
_refine_ls_R_factor_obs           0.0565
_refine_ls_wR_factor_all          0.1406
_refine_ls_wR_factor_obs          0.1089
_refine_ls_goodness_of_fit_all    1.007
_refine_ls_goodness_of_fit_obs    1.150
_refine_ls_restrained_S_all       1.007
_refine_ls_restrained_S_obs       1.150
_refine_ls_shift/esd_max          1.408
_refine_ls_shift/esd_mean         0.057

loop_
 _atom_site_label
 _atom_site_type_symbol
 _atom_site_fract_x
 _atom_site_fract_y
 _atom_site_fract_z
 _atom_site_U_iso_or_equiv
 _atom_site_thermal_displace_type
 _atom_site_occupancy
 _atom_site_calc_flag
 _atom_site_refinement_flags
 _atom_site_disorder_group
Ag Ag 0.01520(5) 0.13591(4) 0.00134(3) 0.0610(3) Uani 1 d . .
N1 N -0.1508(6) 0.1508(5) -0.0533(3) 0.053(2) Uani 1 d . .
C2 C -0.1408(7) 0.1740(6) -0.1086(4) 0.068(3) Uani 1 d . .
H2 H -0.0611(7) 0.1885(6) -0.1233(4) 0.082 Uiso 1 calc R .
C3 C -0.2435(7) 0.1777(6) -0.1457(3) 0.065(2) Uani 1 d . .
H3 H -0.2311(7) 0.1936(6) -0.1843(3) 0.078 Uiso 1 calc R .
C4 C -0.3634(7) 0.1582(5) -0.1259(3) 0.042(2) Uani 1 d . .
C5 C -0.3709(7) 0.1331(6) -0.0689(3) 0.062(2) Uani 1 d . .
H5 H -0.4492(7) 0.1174(6) -0.0530(3) 0.074 Uiso 1 calc R .
C6 C -0.2644(8) 0.1307(6) -0.0342(3) 0.066(2) Uani 1 d . .
H6 H -0.2741(8) 0.1141(6) 0.0044(3) 0.079 Uiso 1 calc R .
C7 C -0.4780(8) 0.1584(6) -0.1647(4) 0.052(2) Uani 1 d . .
H7A H -0.4757(65) 0.0992(54) -0.1883(32) 0.062 Uiso 1 calc . .
H7B H -0.5530(65) 0.1546(53) -0.1407(29) 0.062 Uiso 1 calc . .
C8 C -0.4904(7) 0.2464(7) -0.2038(3) 0.055(2) Uani 1 d . .
H8A H -0.5644(61) 0.2372(54) -0.2280(29) 0.067 Uiso 1 calc . .
H8B H -0.4171(61) 0.2485(55) -0.2290(28) 0.067 Uiso 1 calc . .
C9 C -0.5019(8) 0.3460(7) -0.1732(4) 0.058(2) Uani 1 d . .
H9A H -0.4247(69) 0.3579(54) -0.1516(31) 0.070 Uiso 1 calc . .
H9B H -0.5091(69) 0.3975(55) -0.2020(33) 0.070 Uiso 1 calc . .
C10 C -0.6124(6) 0.3540(5) -0.1326(3) 0.046(2) Uani 1 d . .
C11 C -0.5998(8) 0.3527(6) -0.0740(4) 0.063(2) Uani 1 d . .
H11 H -0.5196(8) 0.3484(6) -0.0577(4) 0.076 Uiso 1 calc R .
C12 C -0.7039(8) 0.3576(6) -0.0387(3) 0.062(2) Uani 1 d . .
H12 H -0.6908(8) 0.3559(6) 0.0009(3) 0.075 Uiso 1 calc R .
N13 N -0.8221(6) 0.3648(4) -0.0576(3) 0.053(2) Uani 1 d . .
C14 C -0.8343(7) 0.3694(6) -0.1146(4) 0.064(2) Uani 1 d . .
H14 H -0.9151(7) 0.3776(6) -0.1296(4) 0.077 Uiso 1 calc R .
C15 C -0.7351(7) 0.3628(6) -0.1526(3) 0.066(2) Uani 1 d . .
H15 H -0.7506(7) 0.3642(6) -0.1920(3) 0.079 Uiso 1 calc R .
S S 0.1958(2) 0.0247(2) -0.10774(9) 0.0562(6) Uani 1 d . .
O1 O 0.3212(5) -0.0043(4) -0.0960(2) 0.076(2) Uani 1 d . .
O2 O 0.1814(7) 0.1325(5) -0.1029(3) 0.118(3) Uani 1 d . .
O3 O 0.0963(6) -0.0246(5) -0.0812(3) 0.111(3) Uani 1 d . .
C C 0.1736(11) 0.0121(8) -0.1843(4) 0.079(3) Uani 1 d . .
F1 F 0.2549(7) 0.0497(6) -0.2162(3) 0.150(3) Uani 1 d . .
F2 F 0.0587(6) 0.0339(5) -0.2008(2) 0.107(2) Uani 1 d . .
F3 F 0.1784(8) -0.0867(6) -0.1955(3) 0.160(3) Uani 1 d . .

loop_
 _atom_site_aniso_label
 _atom_site_aniso_U_11
 _atom_site_aniso_U_22
 _atom_site_aniso_U_33
 _atom_site_aniso_U_23
 _atom_site_aniso_U_13
 _atom_site_aniso_U_12
Ag 0.0608(4) 0.0582(4) 0.0639(4) -0.0003(4) -0.0169(4) 0.0009(3)
N1 0.052(4) 0.057(4) 0.052(4) 0.007(4) -0.002(3) 0.009(4)
C2 0.040(5) 0.099(8) 0.066(6) 0.009(6) 0.006(5) -0.010(5)
C3 0.053(5) 0.092(7) 0.048(5) 0.021(5) 0.003(4) 0.001(5)
C4 0.049(5) 0.034(4) 0.043(5) -0.007(3) -0.001(4) -0.003(4)
C5 0.043(5) 0.081(6) 0.061(6) 0.013(5) 0.011(4) -0.002(5)
C6 0.068(6) 0.083(7) 0.047(5) 0.016(5) 0.000(5) 0.008(6)
C7 0.047(5) 0.050(5) 0.058(6) -0.006(5) -0.005(4) -0.009(5)
C8 0.049(5) 0.071(5) 0.046(5) -0.001(6) 0.002(4) 0.001(6)
C9 0.051(6) 0.053(6) 0.070(6) 0.006(5) -0.002(4) 0.009(5)
C10 0.039(4) 0.039(4) 0.061(5) 0.000(4) -0.001(4) 0.000(4)
C11 0.056(5) 0.079(6) 0.055(6) -0.009(5) -0.011(4) 0.006(5)
C12 0.058(6) 0.082(6) 0.047(5) -0.004(5) -0.006(4) 0.000(5)
N13 0.065(5) 0.051(4) 0.044(4) 0.001(3) 0.007(3) 0.009(4)
C14 0.045(5) 0.081(7) 0.066(6) 0.001(5) -0.004(4) 0.014(5)
C15 0.057(5) 0.088(6) 0.052(5) 0.011(5) 0.006(4) 0.015(5)
S 0.0466(13) 0.076(2) 0.0457(13) 0.0029(11) 0.0016(11) -0.0004(12)
O1 0.051(4) 0.116(5) 0.060(4) 0.000(3) -0.004(3) 0.014(3)
O2 0.132(6) 0.072(5) 0.151(7) -0.035(5) -0.011(5) 0.016(5)
O3 0.088(5) 0.165(7) 0.081(5) 0.045(5) -0.011(4) -0.055(5)
C 0.089(9) 0.075(8) 0.073(7) -0.010(6) -0.024(7) 0.001(6)
F1 0.113(5) 0.280(10) 0.058(4) 0.044(5) 0.004(4) -0.056(6)
F2 0.091(4) 0.155(6) 0.074(4) 0.007(4) -0.041(3) 0.024(4)
F3 0.207(9) 0.149(7) 0.124(6) -0.055(5) -0.054(5) 0.028(6)

_geom_special_details
;
 All esds (except the esd in the dihedral angle between two l.s. planes)
 are estimated using the full covariance matrix.  The cell esds are taken
 into account individually in the estimation of esds in distances, angles
 and torsion angles; correlations between esds in cell parameters are only
 used when they are defined by crystal symmetry.  An approximate (isotropic)
 treatment of cell esds is used for estimating esds involving l.s. planes.
;

loop_
 _geom_bond_atom_site_label_1
 _geom_bond_atom_site_label_2
 _geom_bond_distance
 _geom_bond_site_symmetry_2
 _geom_bond_publ_flag
Ag N13 2.159(6) 3_655 ?
Ag N1 2.174(6) . ?
Ag Ag 3.0886(12) 3 ?
N1 C6 1.309(9) . ?
N1 C2 1.325(9) . ?
C2 C3 1.386(10) . ?
C3 C4 1.374(9) . ?
C4 C5 1.369(10) . ?
C4 C7 1.508(10) . ?
C5 C6 1.384(10) . ?
C7 C8 1.504(11) . ?
C8 C9 1.529(11) . ?
C9 C10 1.505(10) . ?
C10 C11 1.366(10) . ?
C10 C15 1.383(10) . ?
C11 C12 1.373(10) . ?
C12 N13 1.327(9) . ?
N13 C14 1.330(9) . ?
N13 Ag 2.159(6) 3_455 ?
C14 C15 1.373(10) . ?
S O3 1.390(6) . ?
S O1 1.410(5) . ?
S O2 1.471(6) . ?
S C 1.799(10) . ?
C F1 1.243(11) . ?
C F2 1.307(10) . ?
C F3 1.362(10) . ?

loop_
 _geom_angle_atom_site_label_1
 _geom_angle_atom_site_label_2
 _geom_angle_atom_site_label_3
 _geom_angle
 _geom_angle_site_symmetry_1
 _geom_angle_site_symmetry_3
 _geom_angle_publ_flag
N13 Ag N1 174.8(2) 3_655 . ?
N13 Ag Ag 91.0(2) 3_655 3 ?
N1 Ag Ag 84.0(2) . 3 ?
C6 N1 C2 116.7(7) . . ?
C6 N1 Ag 121.7(5) . . ?
C2 N1 Ag 121.5(5) . . ?
N1 C2 C3 123.2(7) . . ?
C4 C3 C2 120.6(7) . . ?
C5 C4 C3 115.1(7) . . ?
C5 C4 C7 122.0(7) . . ?
C3 C4 C7 122.8(7) . . ?
C4 C5 C6 121.3(7) . . ?
N1 C6 C5 123.1(7) . . ?
C8 C7 C4 115.6(7) . . ?
C7 C8 C9 115.1(7) . . ?
C10 C9 C8 114.6(7) . . ?
C11 C10 C15 115.3(7) . . ?
C11 C10 C9 123.1(7) . . ?
C15 C10 C9 121.6(7) . . ?
C10 C11 C12 120.9(7) . . ?
N13 C12 C11 124.2(7) . . ?
C12 N13 C14 114.9(7) . . ?
C12 N13 Ag 123.4(5) . 3_455 ?
C14 N13 Ag 121.6(5) . 3_455 ?
N13 C14 C15 124.2(7) . . ?
C14 C15 C10 120.4(8) . . ?
O3 S O1 119.5(4) . . ?
O3 S O2 111.4(5) . . ?
O1 S O2 111.1(4) . . ?
O3 S C 107.0(5) . . ?
O1 S C 106.7(4) . . ?
O2 S C 99.0(5) . . ?
F1 C F2 112.0(9) . . ?
F1 C F3 105.2(10) . . ?
F2 C F3 101.6(8) . . ?
F1 C S 117.3(7) . . ?
F2 C S 112.9(8) . . ?
F3 C S 106.0(7) . . ?

_refine_diff_density_max    0.533
_refine_diff_density_min   -0.568
_refine_diff_density_rms    0.094


data_3

_exptl_absorpt_correction_nazim   3
_diffrn_measurement_domega        1.0+0.35tg(theta)
_diffrn_measurement_rtime         50

_chemical_formula_sum             'C67 H70 Ag2 F6 N10 O6 S2'
_chemical_formula_weight          1505.2

loop_
 _atom_type_symbol
 _atom_type_description
 _atom_type_scat_dispersion_real
 _atom_type_scat_dispersion_imag
 _atom_type_scat_source
 'C'  'C'   0.0033   0.0016
 'International Tables Vol C Tables 4.2.6.8 and 6.1.1.4'
 'H'  'H'   0.0000   0.0000
 'International Tables Vol C Tables 4.2.6.8 and 6.1.1.4'
 'N'  'N'   0.0061   0.0033
 'International Tables Vol C Tables 4.2.6.8 and 6.1.1.4'
 'O'  'O'   0.0106   0.0060
 'International Tables Vol C Tables 4.2.6.8 and 6.1.1.4'
 'F'  'F'   0.0171   0.0103
 'International Tables Vol C Tables 4.2.6.8 and 6.1.1.4'
 'S'  'S'   0.1246   0.1234
 'International Tables Vol C Tables 4.2.6.8 and 6.1.1.4'
 'Ag'  'Ag'  -0.8971   1.1015
 'International Tables Vol C Tables 4.2.6.8 and 6.1.1.4'

_symmetry_cell_setting            Triclinic
_symmetry_space_group_name_H-M    'P -1  (2)'

loop_
 _symmetry_equiv_pos_as_xyz
 'x, y, z'
 '-x, -y, -z'

_cell_length_a                    10.745(5)
_cell_length_b                    12.039(2)
_cell_length_c                    16.469(3)
_cell_angle_alpha                 70.04(2)
_cell_angle_beta                  83.31(3)
_cell_angle_gamma                 63.57(2)
_cell_volume                      1791.6(9)
_cell_formula_units_Z             1
_cell_measurement_temperature     293(2)
_cell_measurement_reflns_used     25
_cell_measurement_theta_min       8
_cell_measurement_theta_max       12

_exptl_crystal_description        cubic
_exptl_crystal_colour             colourless
_exptl_crystal_size_max           0.27
_exptl_crystal_size_mid           0.25
_exptl_crystal_size_min           0.24
_exptl_crystal_density_diffrn     1.395
_exptl_crystal_F_000              770
_exptl_absorpt_coefficient_mu     0.675
_exptl_absorpt_correction_type    psi-scan
_exptl_absorpt_correction_T_min   0.89
_exptl_absorpt_correction_T_max   1.00

_diffrn_ambient_temperature       293(2)
_diffrn_radiation_wavelength      0.71073
_diffrn_radiation_type            MoK\a
_diffrn_radiation_source          'fine-focus sealed tube'
_diffrn_radiation_monochromator   graphite
_diffrn_measurement_device        CAD4
_diffrn_measurement_method        omega-scan
_diffrn_standards_number          3
_diffrn_standards_interval_time   2h
_diffrn_standards_decay_%         6
_diffrn_reflns_number             6272
_diffrn_reflns_av_R_equivalents   0.0000
_diffrn_reflns_av_sigmaI/netI     0.0381
_diffrn_reflns_limit_h_min        -11
_diffrn_reflns_limit_h_max        12
_diffrn_reflns_limit_k_min        -12
_diffrn_reflns_limit_k_max        14
_diffrn_reflns_limit_l_min        0
_diffrn_reflns_limit_l_max        19
_diffrn_reflns_theta_min          3
_diffrn_reflns_theta_max          25
_reflns_number_total              6272
_reflns_number_observed           2639
_reflns_observed_criterion        >1sigma(I)

_computing_structure_solution     SIR92
_computing_structure_refinement   'SHELXL-93 (Sheldrick, 1993)'
_computing_molecular_graphics     SCHAKAL

_refine_special_details
;
 Refinement on F^2^ for ALL reflections except for 0 with very negative F^2^
 or flagged by the user for potential systematic errors.  Weighted R-factors
 wR and all goodnesses of fit S are based on F^2^, conventional R-factors R
 are based on F, with F set to zero for negative F^2^. The observed criterion
 of F^2^ > 2sigma(F^2^) is used only for calculating _R_factor_obs etc. and is
 not relevant to the choice of reflections for refinement.  R-factors based
 on F^2^ are statistically about twice as large as those based on F, and R-
 factors based on ALL data will be even larger.
;

_refine_ls_structure_factor_coef  Fsqd
_refine_ls_matrix_type            full
_refine_ls_weighting_scheme
 'calc w=1/[\s^2^(Fo^2^)+(0.1370P)^2^+9.1830P] where P=(Fo^2^+2Fc^2^)/3'
_atom_sites_solution_primary      direct
_atom_sites_solution_secondary    difmap
_atom_sites_solution_hydrogens    geom
_refine_ls_hydrogen_treatment     riding
_refine_ls_extinction_method      none
_refine_ls_number_reflns          2940
_refine_ls_number_parameters      383
_refine_ls_number_restraints      12
_refine_ls_R_factor_obs           0.0965
_refine_ls_wR_factor_obs          0.2451
_refine_ls_goodness_of_fit_obs    1.139
_refine_ls_restrained_S_obs       1.158
_refine_ls_shift/esd_max          -0.263
_refine_ls_shift/esd_mean         0.029

loop_
 _atom_site_label
 _atom_site_type_symbol
 _atom_site_fract_x
 _atom_site_fract_y
 _atom_site_fract_z
 _atom_site_U_iso_or_equiv
 _atom_site_thermal_displace_type
 _atom_site_occupancy
 _atom_site_calc_flag
 _atom_site_refinement_flags
 _atom_site_disorder_group
Ag Ag 0.04695(15) 0.44219(11) 0.69435(9) 0.0905(7) Uani 1 d . .
N11 N -0.0906(13) 0.6594(11) 0.6227(8) 0.070(3) Uani 1 d . .
C12 C -0.0408(16) 0.7305(13) 0.5602(11) 0.087(5) Uani 1 d . .
H12 H 0.0496(16) 0.6891(13) 0.5437(11) 0.104 Uiso 1 calc R .
C13 C -0.1153(16) 0.8609(14) 0.5190(10) 0.074(4) Uani 1 d . .
H13 H -0.0751(16) 0.9058(14) 0.4754(10) 0.089 Uiso 1 calc R .
C14 C -0.2509(15) 0.9284(13) 0.5409(9) 0.063(4) Uani 1 d . .
C15 C -0.3012(16) 0.8537(15) 0.6027(11) 0.082(5) Uani 1 d . .
H15 H -0.3923(16) 0.8920(15) 0.6189(11) 0.099 Uiso 1 calc R .
C16 C -0.2207(19) 0.7223(16) 0.6421(11) 0.089(5) Uani 1 d . .
H16 H -0.2598(19) 0.6751(16) 0.6848(11) 0.107 Uiso 1 calc R .
C17 C -0.3331(16) 1.0736(14) 0.5017(10) 0.077(4) Uani 1 d . .
H17A H -0.3374(16) 1.0960(14) 0.4393(10) 0.093 Uiso 1 calc R .
H17B H -0.4274(16) 1.0982(14) 0.5212(10) 0.093 Uiso 1 calc R .
C18 C -0.2739(15) 1.1507(14) 0.5239(12) 0.086(5) Uani 1 d . .
H18A H -0.1815(15) 1.1297(14) 0.5014(12) 0.103 Uiso 1 calc R .
H18B H -0.2645(15) 1.1244(14) 0.5863(12) 0.103 Uiso 1 calc R .
C19 C -0.3611(15) 1.2985(13) 0.4886(13) 0.098(6) Uani 1 d . .
H19A H -0.3828(15) 1.3238(13) 0.4276(13) 0.118 Uiso 1 calc R .
H19B H -0.3077(15) 1.3426(13) 0.4946(13) 0.118 Uiso 1 calc R .
C110 C -0.4969(17) 1.3426(13) 0.5362(14) 0.078(5) Uani 1 d . .
C111 C -0.6136(19) 1.3646(14) 0.4969(10) 0.076(5) Uani 1 d . .
H111 H -0.6095(19) 1.3568(14) 0.4423(10) 0.091 Uiso 1 calc R .
C112 C -0.7387(18) 1.3988(15) 0.5377(12) 0.081(5) Uani 1 d . .
H112 H -0.8180(18) 1.4142(15) 0.5099(12) 0.098 Uiso 1 calc R .
N113 N -0.7479(14) 1.4103(11) 0.6177(10) 0.076(4) Uani 1 d . .
C114 C -0.6348(20) 1.3949(15) 0.6512(11) 0.079(5) Uani 1 d . .
H114 H -0.6402(20) 1.4102(15) 0.7034(11) 0.095 Uiso 1 calc R .
C115 C -0.5102(19) 1.3579(15) 0.6142(13) 0.085(5) Uani 1 d . .
H115 H -0.4322(19) 1.3427(15) 0.6434(13) 0.102 Uiso 1 calc R .
N21 N 0.0459(16) 0.4047(12) 0.8421(9) 0.075(3) Uani 1 d . .
C22 C -0.0731(17) 0.4310(14) 0.8815(10) 0.068(4) Uani 1 d . .
H22 H -0.1542(17) 0.4742(14) 0.8469(10) 0.081 Uiso 1 calc R .
C23 C -0.0863(17) 0.4011(14) 0.9656(12) 0.072(4) Uani 1 d . .
H23 H -0.1740(17) 0.4238(14) 0.9887(12) 0.086 Uiso 1 calc R .
C24 C 0.0358(21) 0.3332(14) 1.0213(10) 0.073(4) Uani 1 d . .
C25 C 0.1602(18) 0.3066(15) 0.9818(11) 0.080(5) Uani 1 d . .
H25 H 0.2433(18) 0.2636(15) 1.0144(11) 0.096 Uiso 1 calc R .
C26 C 0.1604(20) 0.3435(16) 0.8949(14) 0.086(5) Uani 1 d . .
H26 H 0.2460(20) 0.3255(16) 0.8694(14) 0.103 Uiso 1 calc R .
C27 C 0.0369(20) 0.2857(14) 1.1213(10) 0.088(5) Uani 1 d . .
H27A H -0.0397(20) 0.3507(14) 1.1415(10) 0.106 Uiso 1 calc R .
H27B H 0.1234(20) 0.2712(14) 1.1451(10) 0.106 Uiso 1 calc R .
C28 C 0.0215(19) 0.1524(14) 1.1504(10) 0.083(5) Uani 1 d . .
H28A H -0.0621(19) 0.1669(14) 1.1231(10) 0.099 Uiso 1 calc R .
H28B H 0.1005(19) 0.0874(14) 1.1316(10) 0.099 Uiso 1 calc R .
C29 C 0.0140(21) 0.1016(15) 1.2475(10) 0.091(5) Uani 1 d . .
H29A H -0.0657(21) 0.1655(15) 1.2666(10) 0.109 Uiso 1 calc R .
H29B H 0.0973(21) 0.0869(15) 1.2752(10) 0.109 Uiso 1 calc R .
C210 C 0.0008(20) -0.0262(15) 1.2720(9) 0.073(4) Uani 1 d . .
C211 C -0.1226(20) -0.0342(15) 1.2882(11) 0.085(5) Uani 1 d . .
H211 H -0.2030(20) 0.0407(15) 1.2881(11) 0.102 Uiso 1 calc R .
C212 C -0.1311(18) -0.1487(16) 1.3044(11) 0.089(5) Uani 1 d . .
H212 H -0.2177(18) -0.1499(16) 1.3132(11) 0.107 Uiso 1 calc R .
N213 N -0.0155(17) -0.2628(12) 1.3081(8) 0.083(4) Uani 1 d . .
C214 C 0.1053(18) -0.2565(15) 1.2965(11) 0.087(5) Uani 1 d . .
H214 H 0.1856(18) -0.3335(15) 1.3012(11) 0.104 Uiso 1 calc R .
C215 C 0.1181(17) -0.1432(15) 1.2782(10) 0.074(4) Uani 1 d . .
H215 H 0.2055(17) -0.1440(15) 1.2697(10) 0.089 Uiso 1 calc R .
C C -0.5468(23) 0.5525(25) 0.8663(23) 0.167(10) Uiso 1 d D .
F1 F -0.6497(17) 0.6418(18) 0.8938(11) 0.197(7) Uani 1 d D .
F2 F -0.5646(28) 0.4507(20) 0.8805(15) 0.284(12) Uani 1 d D .
F3 F -0.4215(20) 0.5338(37) 0.8867(23) 0.597(44) Uani 1 d D .
S S -0.5091(10) 0.6180(8) 0.7636(5) 0.176(4) Uani 1 d D .
O1 O -0.4093(16) 0.5202(18) 0.7336(12) 0.171(7) Uani 1 d D .
O2 O -0.5374(29) 0.7483(16) 0.7289(15) 0.253(13) Uani 1 d D .
O3 O -0.6552(23) 0.6140(35) 0.7633(36) 0.448(32) Uani 1 d D .
C1S C 0.8047(100) 0.0358(98) 0.0458(57) 0.186(30) Uiso 0.50 d P .
C2S C 0.7113(83) 0.0763(72) -0.0193(49) 0.206(27) Uiso 0.50 d P .
C3S C 0.5485(69) 0.1471(63) -0.0036(40) 0.185(22) Uiso 0.50 d P .
C21S C 0.9517(23) 0.0193(29) 0.0059(22) 0.105(12) Uiso 0.50 d PG .
C22S C 1.0003(30) 0.0916(21) -0.0638(19) 0.116(17) Uiso 0.50 d PG .
C23S C 1.1403(33) 0.0401(26) -0.0823(17) 0.120(15) Uiso 0.50 d PG .
N24S N 1.2317(23) -0.0838(27) -0.0311(21) 0.102(14) Uiso 0.50 d PG .
C25S C 1.1832(27) -0.1562(19) 0.0387(17) 0.090(10) Uiso 0.50 d PG .
C26S C 1.0432(30) -0.1046(26) 0.0572(16) 0.103(15) Uiso 0.50 d PG .
C11S C 0.5127(26) 0.0633(24) 0.0689(14) 0.111(12) Uiso 0.50 d PG .
C12S C 0.4830(27) -0.0406(25) 0.0754(14) 0.100(11) Uiso 0.50 d PG .
C13S C 0.4405(26) -0.1036(21) 0.1531(18) 0.116(13) Uiso 0.50 d PG .
N14S N 0.4277(26) -0.0629(25) 0.2243(13) 0.110(10) Uiso 0.50 d PG .
C15S C 0.4574(31) 0.0409(28) 0.2179(15) 0.221(28) Uiso 0.50 d PG .
C16S C 0.4999(29) 0.1040(23) 0.1402(19) 0.099(11) Uiso 0.50 d PG .

loop_
 _atom_site_aniso_label
 _atom_site_aniso_U_11
 _atom_site_aniso_U_22
 _atom_site_aniso_U_33
 _atom_site_aniso_U_23
 _atom_site_aniso_U_13
 _atom_site_aniso_U_12
Ag 0.1009(11) 0.0547(7) 0.0962(10) -0.0127(6) 0.0293(7) -0.0316(6)
N11 0.069(8) 0.059(7) 0.071(8) -0.015(6) 0.011(7) -0.025(6)
C12 0.077(11) 0.052(9) 0.106(13) -0.017(8) 0.039(10) -0.022(8)
C13 0.070(11) 0.065(9) 0.074(10) -0.008(8) 0.009(8) -0.031(8)
C14 0.053(9) 0.058(8) 0.070(10) -0.015(7) -0.011(7) -0.019(7)
C15 0.059(10) 0.069(10) 0.100(13) -0.017(9) 0.013(9) -0.022(8)
C16 0.091(13) 0.073(11) 0.090(12) -0.017(9) 0.025(10) -0.036(10)
C17 0.068(10) 0.071(10) 0.074(11) -0.015(8) -0.013(8) -0.018(8)
C18 0.054(9) 0.060(9) 0.134(15) -0.031(9) 0.021(9) -0.020(8)
C19 0.057(10) 0.049(8) 0.164(17) -0.019(9) 0.014(11) -0.015(7)
C110 0.056(11) 0.043(8) 0.108(15) 0.001(8) 0.017(11) -0.021(7)
C111 0.081(13) 0.076(10) 0.066(11) -0.027(8) 0.026(10) -0.032(9)
C112 0.077(12) 0.079(11) 0.081(13) -0.031(9) -0.008(10) -0.021(9)
N113 0.056(9) 0.065(8) 0.093(11) -0.012(7) 0.013(8) -0.025(7)
C114 0.069(12) 0.079(10) 0.084(12) -0.024(9) 0.001(11) -0.028(9)
C115 0.083(14) 0.079(11) 0.085(14) -0.014(10) -0.003(11) -0.036(10)
N21 0.072(9) 0.063(7) 0.090(10) -0.018(7) 0.000(9) -0.034(7)
C22 0.069(11) 0.076(10) 0.057(11) -0.013(8) 0.003(8) -0.038(8)
C23 0.064(11) 0.072(9) 0.087(13) -0.033(9) 0.004(10) -0.031(8)
C24 0.111(14) 0.057(8) 0.076(12) -0.032(8) 0.005(12) -0.051(10)
C25 0.078(13) 0.081(11) 0.061(12) -0.017(9) -0.017(10) -0.019(9)
C26 0.072(13) 0.082(11) 0.107(16) -0.029(10) 0.013(11) -0.040(10)
C27 0.132(15) 0.067(9) 0.085(12) -0.028(8) 0.002(10) -0.057(10)
C28 0.113(13) 0.066(9) 0.071(11) -0.011(8) -0.018(9) -0.043(9)
C29 0.144(16) 0.075(10) 0.059(10) -0.020(8) -0.002(10) -0.051(11)
C210 0.107(14) 0.066(10) 0.043(9) -0.008(7) -0.016(9) -0.039(10)
C211 0.107(14) 0.065(10) 0.093(13) -0.037(9) 0.023(10) -0.043(10)
C212 0.078(11) 0.070(11) 0.106(13) -0.026(9) 0.023(10) -0.028(10)
N213 0.104(11) 0.057(8) 0.074(9) -0.007(6) -0.003(8) -0.031(8)
C214 0.061(11) 0.068(10) 0.102(13) -0.004(9) -0.016(10) -0.015(9)
C215 0.080(11) 0.072(10) 0.079(11) -0.017(8) -0.018(9) -0.042(10)
F1 0.188(14) 0.231(17) 0.194(14) -0.123(13) 0.116(12) -0.096(13)
F2 0.374(32) 0.206(19) 0.262(23) 0.022(16) 0.044(22) -0.197(22)
F3 0.142(18) 1.094(102) 0.657(65) -0.704(75) -0.106(27) -0.019(33)
S 0.208(8) 0.135(6) 0.145(6) -0.054(5) 0.109(6) -0.058(6)
O1 0.132(13) 0.210(18) 0.176(16) -0.122(15) 0.036(11) -0.042(12)
O2 0.370(36) 0.114(14) 0.212(22) -0.018(14) 0.070(22) -0.091(19)
O3 0.170(26) 0.453(64) 0.695(91) -0.372(67) 0.035(39) 0.018(33)

_geom_special_details
;
 All esds (except the esd in the dihedral angle between two l.s. planes)
 are estimated using the full covariance matrix.  The cell esds are taken
 into account individually in the estimation of esds in distances, angles
 and torsion angles; correlations between esds in cell parameters are only
 used when they are defined by crystal symmetry.  An approximate (isotropic)
 treatment of cell esds is used for estimating esds involving l.s. planes.
;

loop_
 _geom_bond_atom_site_label_1
 _geom_bond_atom_site_label_2
 _geom_bond_distance
 _geom_bond_site_symmetry_2
 _geom_bond_publ_flag
Ag N11 2.296(11) . ?
Ag N21 2.318(13) . ?
Ag N213 2.344(13) 2_557 ?
Ag N113 2.352(12) 1_645 ?
N11 C16 1.32(2) . ?
N11 C12 1.33(2) . ?
C12 C13 1.36(2) . ?
C13 C14 1.39(2) . ?
C14 C15 1.35(2) . ?
C14 C17 1.50(2) . ?
C15 C16 1.37(2) . ?
C17 C18 1.49(2) . ?
C18 C19 1.52(2) . ?
C19 C110 1.53(2) . ?
C110 C115 1.34(2) . ?
C110 C111 1.36(2) . ?
C111 C112 1.38(2) . ?
C112 N113 1.36(2) . ?
N113 C114 1.30(2) . ?
N113 Ag 2.352(12) 1_465 ?
C114 C115 1.35(2) . ?
N21 C22 1.32(2) . ?
N21 C26 1.35(2) . ?
C22 C23 1.32(2) . ?
C23 C24 1.43(2) . ?
C24 C25 1.37(2) . ?
C24 C27 1.55(2) . ?
C25 C26 1.35(2) . ?
C27 C28 1.59(2) . ?
C28 C29 1.51(2) . ?
C29 C210 1.52(2) . ?
C210 C211 1.36(2) . ?
C210 C215 1.39(2) . ?
C211 C212 1.36(2) . ?
C212 N213 1.37(2) . ?
N213 C214 1.32(2) . ?
N213 Ag 2.344(13) 2_557 ?
C214 C215 1.36(2) . ?
C F2 1.26(2) . ?
C F1 1.32(2) . ?
C F3 1.33(2) . ?
C S 1.69(3) . ?
C O3 1.90(5) . ?
F3 S 2.05(3) . ?
S O2 1.37(2) . ?
S O1 1.389(14) . ?
S O3 1.59(2) . ?
C1S N24S 0.52(12) 2_755 ?
C1S C23S 0.88(12) 2_755 ?
C1S C2S 1.36(10) . ?
C1S C25S 1.67(10) 2_755 ?
C1S C21S 1.59(8) . ?
C2S N24S 1.14(12) 2_755 ?
C2S C3S 1.60(8) . ?
C2S C25S 1.73(9) 2_755 ?
C3S C11S 1.42(6) . ?
C21S C21S 0.96(4) 2_755 ?
C21S C26S 1.20(6) 2_755 ?
C21S C22S 1.26(6) 2_755 ?
C21S C22S 1.39 . ?
C21S C26S 1.39 . ?
C21S C25S 1.63(5) 2_755 ?
C21S C23S 1.67(5) 2_755 ?
C21S N24S 1.82(4) 2_755 ?
C22S C26S 0.44(6) 2_755 ?
C22S C21S 1.26(5) 2_755 ?
C22S C23S 1.39 . ?
C22S C25S 1.82(6) 2_755 ?
C23S C1S 0.88(10) 2_755 ?
C23S N24S 1.39 . ?
C23S C21S 1.67(5) 2_755 ?
C23S C26S 1.82(6) 2_755 ?
N24S C1S 0.52(10) 2_755 ?
N24S C2S 1.14(8) 2_755 ?
N24S C25S 1.39 . ?
N24S C21S 1.82(4) 2_755 ?
C25S C26S 1.39 . ?
C25S C1S 1.67(9) 2_755 ?
C25S C21S 1.63(4) 2_755 ?
C25S C22S 1.82(6) 2_755 ?
C25S C2S 1.73(8) 2_755 ?
C26S C22S 0.43(5) 2_755 ?
C26S C21S 1.20(5) 2_755 ?
C26S C23S 1.82(6) 2_755 ?
C11S C12S 1.39 . ?
C11S C16S 1.39 . ?
C12S C13S 1.39 . ?
C13S N14S 1.39 . ?
N14S C15S 1.39 . ?
C15S C16S 1.39 . ?

loop_
 _geom_angle_atom_site_label_1
 _geom_angle_atom_site_label_2
 _geom_angle_atom_site_label_3
 _geom_angle
 _geom_angle_site_symmetry_1
 _geom_angle_site_symmetry_3
 _geom_angle_publ_flag
N11 Ag N21 110.0(4) . . ?
N11 Ag N213 126.3(5) . 2_557 ?
N21 Ag N213 99.8(4) . 2_557 ?
N11 Ag N113 100.8(4) . 1_645 ?
N21 Ag N113 121.7(6) . 1_645 ?
N213 Ag N113 99.9(5) 2_557 1_645 ?
C16 N11 C12 115.9(12) . . ?
C16 N11 Ag 123.2(10) . . ?
C12 N11 Ag 120.9(10) . . ?
N11 C12 C13 123.2(14) . . ?
C12 C13 C14 121.1(13) . . ?
C15 C14 C13 114.8(13) . . ?
C15 C14 C17 122.3(14) . . ?
C13 C14 C17 122.9(13) . . ?
C14 C15 C16 121.4(14) . . ?
N11 C16 C15 123.5(14) . . ?
C18 C17 C14 113.4(12) . . ?
C17 C18 C19 113.8(14) . . ?
C18 C19 C110 111.7(12) . . ?
C115 C110 C111 116.9(15) . . ?
C115 C110 C19 126.1(19) . . ?
C111 C110 C19 117.0(19) . . ?
C110 C111 C112 120.2(16) . . ?
N113 C112 C111 121.3(16) . . ?
C114 N113 C112 116.3(14) . . ?
C114 N113 Ag 122.2(13) . 1_465 ?
C112 N113 Ag 121.3(12) . 1_465 ?
N113 C114 C115 123.7(17) . . ?
C110 C115 C114 121.3(18) . . ?
C22 N21 C26 115.1(14) . . ?
C22 N21 Ag 119.4(12) . . ?
C26 N21 Ag 125.1(12) . . ?
C23 C22 N21 125.3(15) . . ?
C22 C23 C24 119.2(15) . . ?
C25 C24 C23 116.5(15) . . ?
C25 C24 C27 118.6(17) . . ?
C23 C24 C27 124.9(17) . . ?
C26 C25 C24 118.9(16) . . ?
C25 C26 N21 125.0(16) . . ?
C24 C27 C28 106.9(11) . . ?
C29 C28 C27 110.8(13) . . ?
C28 C29 C210 108.7(12) . . ?
C211 C210 C215 116.3(14) . . ?
C211 C210 C29 123.4(16) . . ?
C215 C210 C29 120.3(16) . . ?
C212 C211 C210 121.5(16) . . ?
C211 C212 N213 121.7(16) . . ?
C214 N213 C212 116.9(14) . . ?
C214 N213 Ag 123.6(11) . 2_557 ?
C212 N213 Ag 118.3(12) . 2_557 ?
N213 C214 C215 123.4(15) . . ?
C214 C215 C210 120.1(15) . . ?
F2 C F1 112.3(21) . . ?
F2 C F3 116.5(24) . . ?
F1 C F3 113.8(20) . . ?
F2 C S 115.2(23) . . ?
F1 C S 111.5(21) . . ?
F3 C S 84.8(22) . . ?
F2 C O3 83.6(20) . . ?
F1 C O3 89.0(18) . . ?
F3 C O3 136.8(28) . . ?
S C O3 52.2(14) . . ?
C F3 S 55.1(18) . . ?
O2 S O1 124.2(12) . . ?
O2 S O3 105.2(14) . . ?
O1 S O3 109.1(13) . . ?
O2 S C 122.0(13) . . ?
O1 S C 110.4(12) . . ?
O3 S C 70.7(20) . . ?
O2 S F3 112.8(16) . . ?
O1 S F3 94.5(11) . . ?
O3 S F3 110.7(21) . . ?
C S F3 40.0(10) . . ?
S O3 C 57.1(15) . . ?
N24S C1S C23S 165.9(100) 2_755 2_755 ?
N24S C1S C2S 53.9(100) 2_755 . ?
C23S C1S C2S 135.7(100) 2_755 . ?
N24S C1S C25S 49.1(88) 2_755 2_755 ?
C23S C1S C25S 139.0(93) 2_755 2_755 ?
C2S C1S C25S 68.6(56) . 2_755 ?
N24S C1S C21S 108.4(100) 2_755 . ?
C23S C1S C21S 79.5(73) 2_755 . ?
C2S C1S C21S 108.9(68) . . ?
C25S C1S C21S 59.8(33) 2_755 . ?
N24S C2S C1S 21.8(51) 2_755 . ?
N24S C2S C3S 106.5(61) 2_755 . ?
C1S C2S C3S 118.8(72) . . ?
N24S C2S C25S 53.3(39) 2_755 2_755 ?
C1S C2S C25S 64.3(57) . 2_755 ?
C3S C2S C25S 122.1(54) . 2_755 ?
C11S C3S C2S 109.7(51) . . ?
C21S C21S C26S 79.2(44) 2_755 2_755 ?
C21S C21S C22S 76.2(39) 2_755 2_755 ?
C26S C21S C22S 155.4(39) 2_755 2_755 ?
C21S C21S C22S 61.8(29) 2_755 . ?
C26S C21S C22S 17.5(25) 2_755 . ?
C22S C21S C22S 138.0(23) 2_755 . ?
C21S C21S C26S 58.2(29) 2_755 . ?
C26S C21S C26S 137.4(25) 2_755 . ?
C22S C21S C26S 18.1(23) 2_755 . ?
C22S C21S C26S 120.0 . . ?
C21S C21S C1S 161.3(58) 2_755 . ?
C26S C21S C1S 118.9(45) 2_755 . ?
C22S C21S C1S 85.4(41) 2_755 . ?
C22S C21S C1S 136.4(39) . . ?
C26S C21S C1S 103.5(39) . . ?
C21S C21S C25S 135.6(59) 2_755 2_755 ?
C26S C21S C25S 56.4(21) 2_755 2_755 ?
C22S C21S C25S 148.1(38) 2_755 2_755 ?
C22S C21S C25S 73.9(34) . 2_755 ?
C26S C21S C25S 166.1(34) . 2_755 ?
C1S C21S C25S 62.6(43) . 2_755 ?
C21S C21S C23S 130.7(56) 2_755 2_755 ?
C26S C21S C23S 150.1(34) 2_755 2_755 ?
C22S C21S C23S 54.4(22) 2_755 2_755 ?
C22S C21S C23S 167.5(31) . 2_755 ?
C26S C21S C23S 72.5(31) . 2_755 ?
C1S C21S C23S 31.1(39) . 2_755 ?
C25S C21S C23S 93.7(22) 2_755 2_755 ?
C21S C21S N24S 176.9(67) 2_755 2_755 ?
C26S C21S N24S 103.5(30) 2_755 2_755 ?
C22S C21S N24S 101.0(32) 2_755 2_755 ?
C22S C21S N24S 120.9(35) . 2_755 ?
C26S C21S N24S 119.1(35) . 2_755 ?
C1S C21S N24S 15.7(41) . 2_755 ?
C25S C21S N24S 47.1(11) 2_755 2_755 ?
C23S C21S N24S 46.6(12) 2_755 2_755 ?
C26S C22S C21S 98.0(74) 2_755 2_755 ?
C26S C22S C23S 175.5(77) 2_755 . ?
C21S C22S C23S 78.0(20) 2_755 . ?
C26S C22S C21S 56.1(66) 2_755 . ?
C21S C22S C21S 42.0(20) 2_755 . ?
C23S C22S C21S 120.0 . . ?
C26S C22S C25S 3.4(49) 2_755 2_755 ?
C21S C22S C25S 101.0(39) 2_755 2_755 ?
C23S C22S C25S 178.9(31) . 2_755 ?
C21S C22S C25S 59.1(28) . 2_755 ?
C1S C23S N24S 5.2(72) 2_755 . ?
C1S C23S C22S 116.7(62) 2_755 . ?
N24S C23S C22S 120.0 . . ?
C1S C23S C21S 69.4(59) 2_755 2_755 ?
N24S C23S C21S 72.5(14) . 2_755 ?
C22S C23S C21S 47.5(14) . 2_755 ?
C1S C23S C26S 115.9(67) 2_755 2_755 ?
N24S C23S C26S 119.1(16) . 2_755 ?
C22S C23S C26S 1.1(19) . 2_755 ?
C21S C23S C26S 46.6(12) 2_755 2_755 ?
C1S N24S C2S 104.3(100) 2_755 2_755 ?
C1S N24S C23S 8.8(100) 2_755 . ?
C2S N24S C23S 110.7(42) 2_755 . ?
C1S N24S C25S 114.4(100) 2_755 . ?
C2S N24S C25S 85.8(42) 2_755 . ?
C23S N24S C25S 120.0 . . ?
C1S N24S C21S 55.9(100) 2_755 2_755 ?
C2S N24S C21S 106.5(43) 2_755 2_755 ?
C23S N24S C21S 60.9(15) . 2_755 ?
C25S N24S C21S 59.1(15) . 2_755 ?
N24S C25S C26S 120.0 . . ?
N24S C25S C1S 16.5(36) . 2_755 ?
C26S C25S C1S 103.7(36) . 2_755 ?
N24S C25S C21S 73.9(17) . 2_755 ?
C26S C25S C21S 46.1(17) . 2_755 ?
C1S C25S C21S 57.6(32) 2_755 2_755 ?
N24S C25S C22S 120.9(17) . 2_755 ?
C26S C25S C22S 1.1(19) . 2_755 ?
C1S C25S C22S 104.6(37) 2_755 2_755 ?
C21S C25S C22S 47.1(12) 2_755 2_755 ?
N24S C25S C2S 40.9(27) . 2_755 ?
C26S C25S C2S 125.9(28) . 2_755 ?
C21S C25S C2S 91.5(30) 2_755 2_755 ?
C22S C25S C2S 126.9(32) 2_755 2_755 ?
C22S C26S C21S 106.4(77) 2_755 2_755 ?
C22S C26S C25S 175.5(80) 2_755 . ?
C21S C26S C25S 77.5(20) 2_755 . ?
C22S C26S C21S 63.9(71) 2_755 . ?
C21S C26S C21S 42.6(20) 2_755 . ?
C25S C26S C21S 120.0 . . ?
C22S C26S C23S 3.4(50) 2_755 2_755 ?
C21S C26S C23S 103.5(37) 2_755 2_755 ?
C25S C26S C23S 178.9(32) . 2_755 ?
C21S C26S C23S 60.9(28) . 2_755 ?
C12S C11S C16S 120.0 . . ?
C12S C11S C3S 130.3(32) . . ?
C16S C11S C3S 109.6(32) . . ?
C13S C12S C11S 120.0 . . ?
N14S C13S C12S 120.0 . . ?
C15S N14S C13S 120.0 . . ?
C16S C15S N14S 120.0 . . ?
C15S C16S C11S 120.0 . . ?

_refine_diff_density_max    1.140
_refine_diff_density_min   -0.551
_refine_diff_density_rms    0.100
